# Supplementary figures and images for: Systematic characterization of cell type-specific master metabolic regulators in Alzheimer's disease
Source: Research Square preprint supplement (doi:10.21203/rs.3.rs-7207381/v1), 2025-08-18

**a**

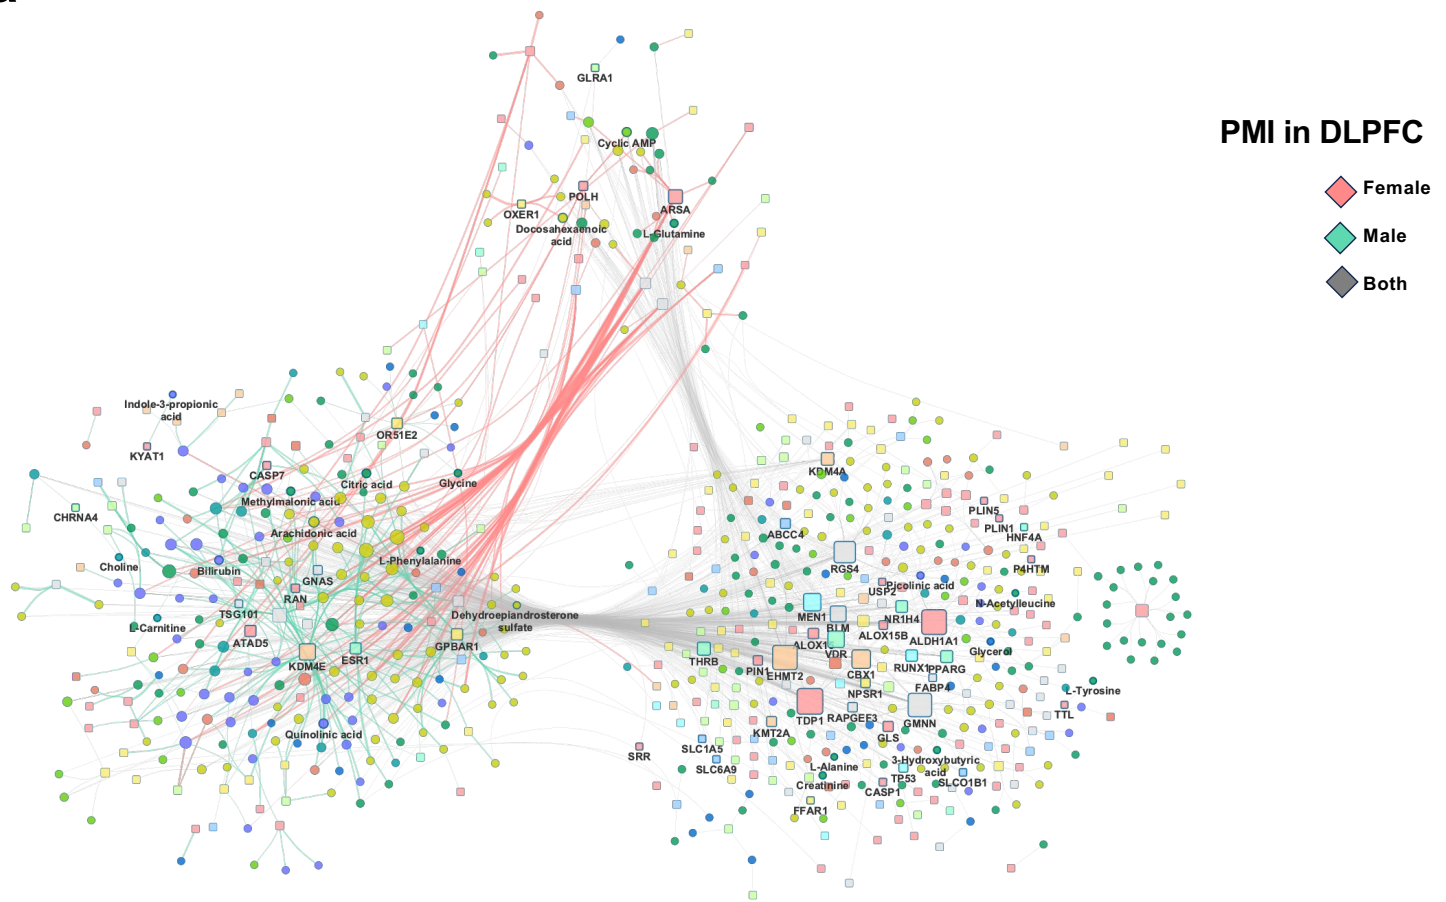**b**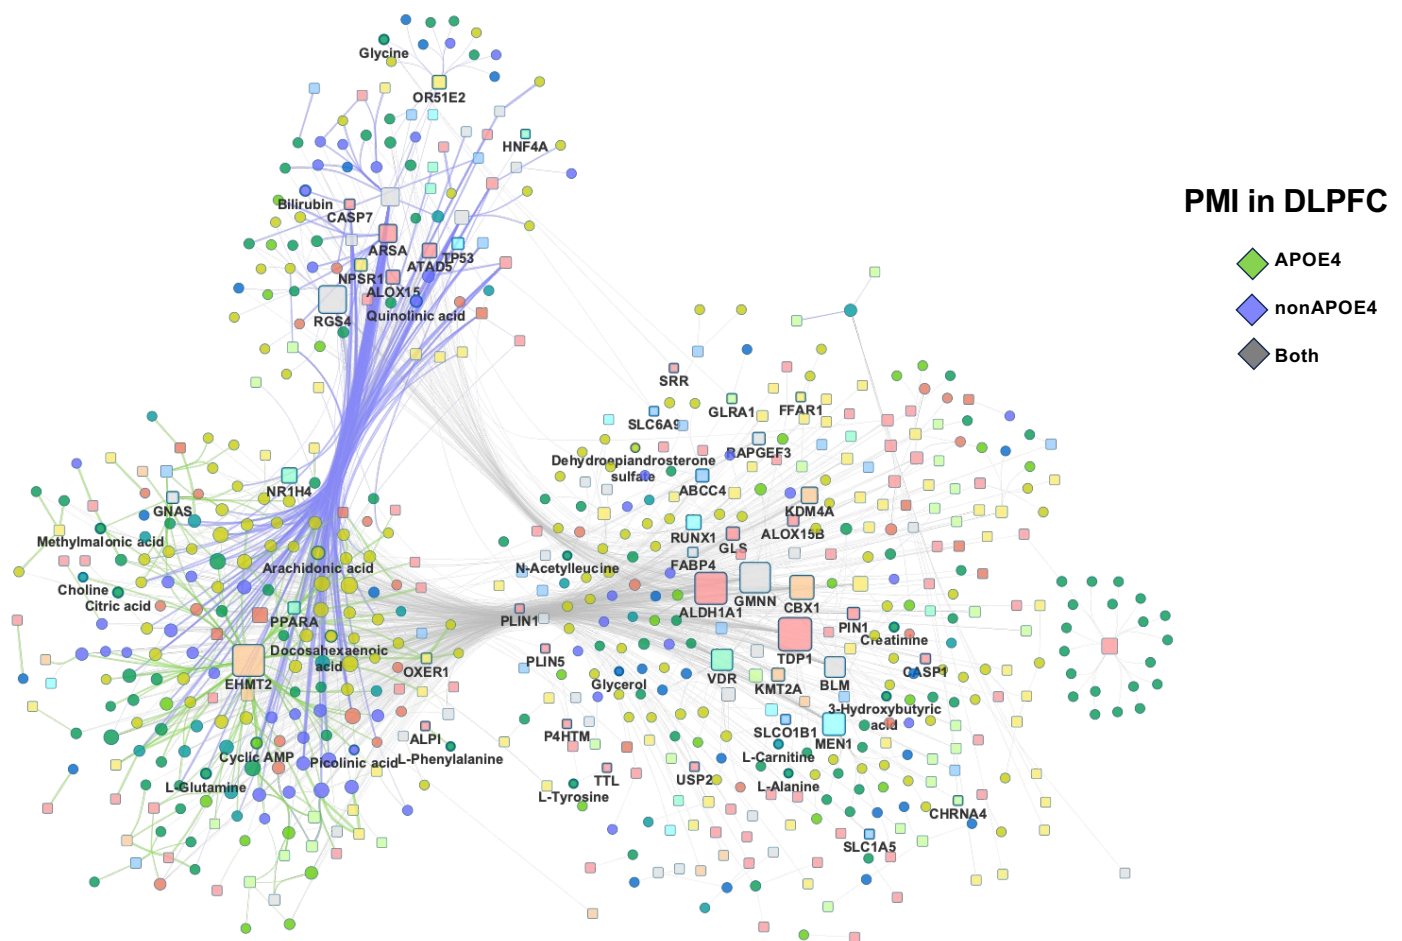

Supplement: Supplementary file 1 [file 1db75f443c0ea263ab871c85.pdf]

a

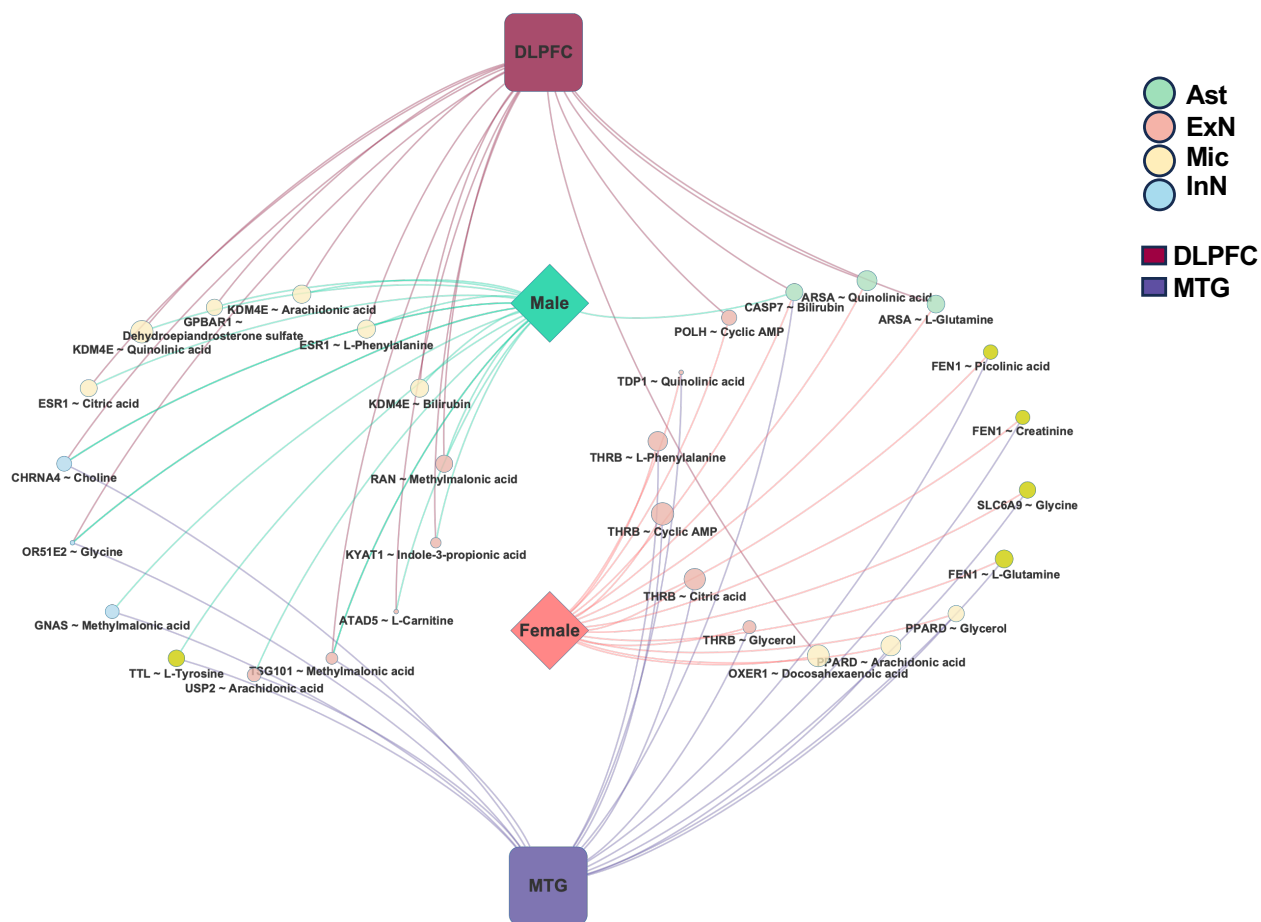

b

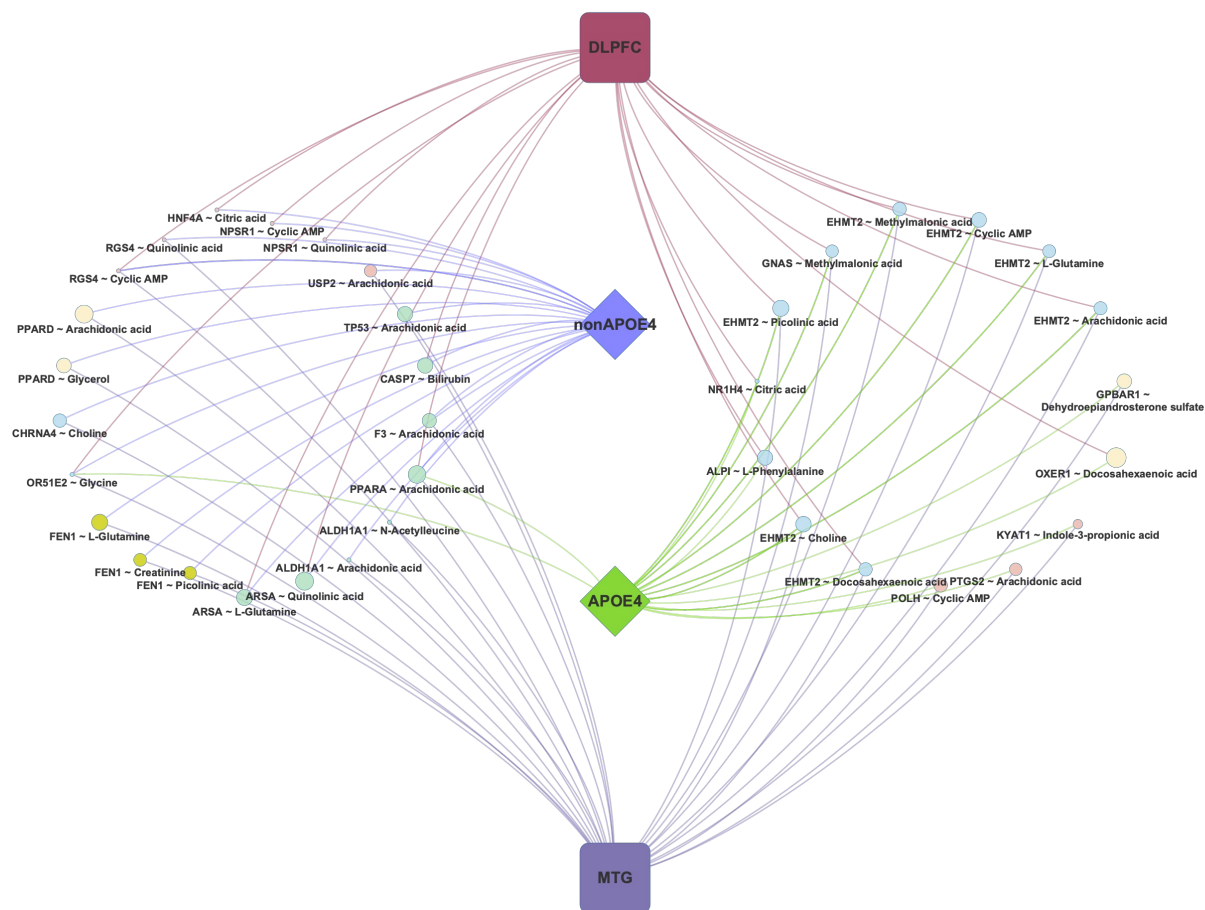

Supplement: Supplementary file 2 [file 30b96f7c5c5f6626ff20c6ad.pdf]

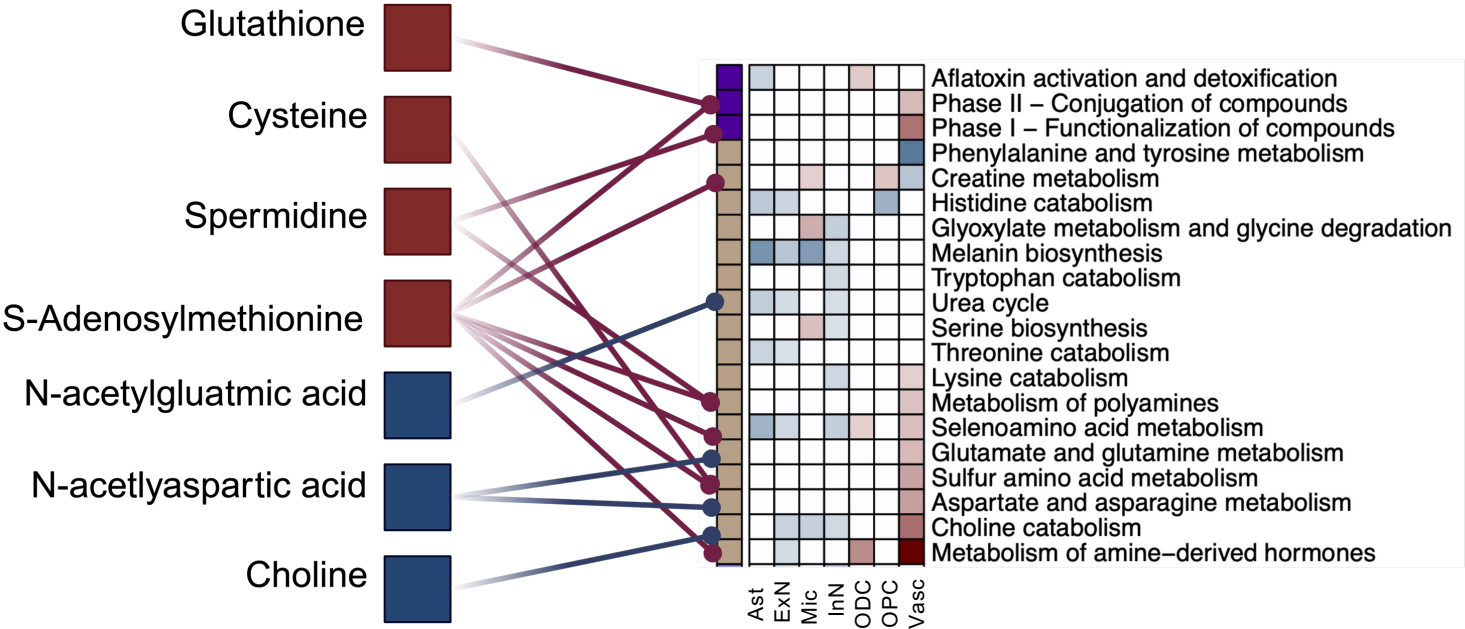

 Sig. increased in AD (FDR < 0.05)

 Sig. decreased in AD (FDR < 0.05)

Supplement: Supplementary file 3 [file f88841e722e918127f02e383.pdf]
